# Supplementary material for: MHC Adaptive Divergence between Closely Related and Sympatric African Cichlids
Source: PLoS One. 2007 Aug 15;2(8):e734. doi: 10.1371/journal.pone.0000734 (PMC1939875; doi:10.1371/journal.pone.0000734)
Supplement: Figure S2 — GenBank accession numbers for intron 1 and exon 2 alleles. Accession numbers for sequences corresponding to intron 1 and exon 2 alleles as numbered and listed in figure S1. (0.10 MB XLS) [file pone.0000734.s002.xls]

## Sheet: Sheet1
Intron 1 allele	Accession numbers
1	EF540204	EF540205	EF540225	EF540224
2	EF540232	EF540309
3	EF540231	EF540230
4	EF540307	EF540201	EF540226	EF540317	EF540223	EF540227
5	EF540294	EF540296	EF540300	EF540289	EF540319	EF540302	EF540298	EF540295	EF540299
6	EF540240	EF540290	EF540292	EF540238	EF540293	EF540301	EF540291
7	EF540199	EF540207	EF540200
8	EF540210	EF540308	EF540211	EF540304	EF540222	EF540213	EF540221	EF540215	EF540217	EF540216	EF540208	EF540218	EF540202	EF540214
9	EF540219	EF540220
10	EF540038	EF540030	EF540021	EF540037	EF540084	EF540098	EF540087	EF540081	EF540016	EF540100	EF540032	EF540035	EF540017	EF540045	EF540009	EF540015	EF540014	EF540043	EF540034	EF540050	EF540192	EF540104	EF540004	EF540047	EF540008	EF540013	EF540019	EF540041	EF540006	EF540036	EF540096	EF540090	EF540078	EF540023	EF540042	EF540092	EF540020	EF540012	EF540106	EF540039	EF540044	EF540011	EF540086	EF540155	EF540146	EF540046	EF540010	EF540093	EF540022
11	EF540029	EF540107
12	EF540075	EF540069
13	EF540070	EF540072	EF540071	EF540088
14	EF540109	EF540108
15	EF540055	EF540085	EF540054	EF540051	EF540094	EF540059	EF540053	EF540052	EF540056	EF540089
16	EF540057	EF540058
17	EF540118	EF540143	EF540112	EF540117	EF540111	EF540114	EF540113	EF540115	EF540194	EF540110
18	EF540076	EF540049	EF540080	EF540063	EF540033	EF540064	EF540068	EF540082	EF540097	EF540083
19	EF540062	EF540061
20	EF539955	EF539953	EF539954	EF540001	EF539959	EF539952	EF539951
21	EF539981	EF539990	EF539961
22	EF539987	EF539942	EF539945	EF539943	EF539944
23	EF539978	EF540003
24	EF539928	EF539934	EF539930	EF539999	EF539997	EF539973	EF539998	EF539927	EF539986	EF539979	EF539929
25	EF539938	EF539996	EF539935	EF539936	EF539937
26	EF539988	EF539968	EF539992
27	EF539965	EF539964
28	EF540315	EF540314	EF540313	EF540312
29	EF540131	EF540141	EF540137
30	EF540142	EF540134	EF540135
31	EF540133	EF540132
32	EF540272	EF540275	EF540273	EF540274	EF540271
33	EF540197	EF540267	EF540268
34	EF540265	EF540266
35	EF540260	EF540276	EF540262	EF540261
36	EF540269	EF540228	EF540270
37	EF540196	EF540277
38	EF540170	EF540173	EF540164	EF540162	EF540145	EF540172	EF540182	EF540128	EF540163	EF540125	EF540188	EF540149	EF540184	EF540165	EF540166	EF540171
39	EF539920	EF540120	EF540167	EF540169	EF540151	EF540158	EF540121	EF540156
40	EF539905	EF539902	EF539913	EF540160	EF539906	EF539914	EF540179	EF539903	EF540119	EF539908	EF539907	EF540122	EF539909	EF539912	EF539911	EF540123	EF539910	EF540148
41	EF539918	EF539919	EF539917
42	EF539916	EF540189	EF539915	EF540181	EF540129
43	EF540186	EF539904
44	EF540185	EF540154	EF540152	EF540153
45	EF540183	EF540175	EF540235	EF540130	EF540178	EF540177	EF540176	EF540174
46	EF539923	EF540257	EF539924	EF539926	EF539925	EF539922
47	EF540286	EF540285	EF540236
48	EF540283	EF540282
49	EF540279	EF540278	EF540280	EF540281
50	EF540234	EF540287	EF540288
51	EF540251	EF540245	EF540246	EF540244	EF540247	EF540248
52	EF540249	EF540250
53	EF540241	EF540242	EF540243	EF540198
54	EF540203
55	EF540303
56	EF540310
57	EF540206
58	EF540297
59	EF540239
60	EF540320
61	EF540233
62	EF540311
63	EF540209
64	EF540212
65	EF540305
66	EF540306
67	EF540101
68	EF540026
69	EF540091
70	EF540103
71	EF540024
72	EF540099
73	EF540025
74	EF540031
75	EF540007
76	EF540005
77	EF540027
78	EF540028
79	EF540073
80	EF540074
81	EF540079
82	EF540102
83	EF540255
84	EF540258
85	EF540191
86	EF540180
87	EF540116
88	EF540193
89	EF540105
90	EF540060
91	EF540065
92	EF540095
93	EF540066
94	EF540067
95	EF540048
96	EF539984
97	EF539994
98	EF539975
99	EF540002
100	EF539946
101	EF539993
102	EF539949
103	EF539960
104	EF539966
105	EF539941
106	EF539947
107	EF540000
108	EF539940
109	EF539939
110	EF539977
111	EF539933
112	EF539932
113	EF539995
114	EF539958
115	EF539971
116	EF539976
117	EF539972
118	EF539931
119	EF539967
120	EF539948
121	EF539974
122	EF539983
123	EF539989
124	EF539950
125	EF539985
126	EF539969
127	EF539991
128	EF539963
129	EF539962
130	EF539980
131	EF539982
132	EF539970
133	EF539957
134	EF539956
135	EF540316
136	EF540140
137	EF540138
138	EF540168
139	EF540254
140	EF540136
141	EF540237
142	EF540139
143	EF540195
144	EF540263
145	EF540264
146	EF540259
147	EF540187
148	EF540127
149	EF540150
150	EF540159
151	EF540190
152	EF539921
153	EF540157
154	EF540124
155	EF540144
156	EF540126
157	EF540147
158	EF540229
159	EF540161
160	EF540256
161	EF540284
162	EF540252
163	EF540253
164	EF540318
Exon 2 allele	Accession numbers
1	EF540142	EF540134
2	EF540138	EF540141	EF540140	EF540137	EF540168
3	EF540081	EF540169	EF540089	EF540083	EF540038	EF540155	EF540035	EF540084	EF539991	EF540054	EF540097	EF540082	EF540042	EF540062	EF540061	EF540036	EF540095	EF540085	EF540063	EF540076	EF540192	EF540066	EF540041	EF540037	EF540146	EF540064	EF540065
4	EF540055	EF540034	EF540107	EF540051	EF540057	EF540053	EF540058	EF540040	EF539990	EF540056
5	EF540048	EF540049
6	EF540096	EF540030
7	EF540091	EF540104	EF540098	EF540018	EF540012	EF540017	EF540103	EF540009	EF540006	EF540014	EF540093	EF540016	EF540013	EF540005	EF540019	EF540011	EF540077	EF540015	EF540010	EF540020	EF540008	EF540024	EF540100	EF540047
8	EF540075	EF540079	EF540071	EF540069	EF540072	EF540070
9	EF540045	EF540046
10	EF540111	EF540116	EF540194	EF540114	EF540112	EF540115	EF540113	EF540110
11	EF540143	EF540117	EF540118
12	EF540202	EF540305	EF540214	EF540211	EF540226	EF540215	EF540216	EF540308	EF540213	EF540210	EF540217	EF540212	EF540208
13	EF540220	EF540219
14	EF540307	EF540227	EF540306	EF540317	EF540201
15	EF540206	EF540223
16	EF540309	EF540232
17	EF540207	EF540200	EF540311	EF540199
18	EF540320	EF540239	EF540296
19	EF540291	EF540240	EF540290	EF540238
20	EF540299	EF540289
21	EF540124	EF539908	EF540123	EF539912	EF539907	EF539911	EF539910	EF539909	EF540119
22	EF539903	EF539902	EF539906	EF539905
23	EF539916	EF539915	EF540161
24	EF540120	EF540121	EF540127	EF540158
25	EF540183	EF540175	EF540177	EF540130	EF540174	EF540178
26	EF540170	EF540187	EF540126	EF540106	EF540171	EF540125	EF540172
27	EF540165	EF540163	EF540166	EF540184	EF540145	EF540182	EF540162	EF540128
28	EF540188	EF540149
29	EF540148	EF539974
30	EF539918	EF539917
31	EF539921	EF539920
32	EF540189	EF540181	EF540092
33	EF540153	EF540152	EF540154
34	EF540229	EF540147
35	EF540185	EF540318
36	EF540280	EF540278
37	EF540282	EF540283
38	EF540288	EF540234
39	EF540285	EF540286
40	EF540313	EF540312
41	EF539923	EF539926	EF539922	EF539924	EF539925
42	EF539988	EF539985	EF539992	EF539967
43	EF539989	EF539966
44	EF539964	EF539963	EF539965
45	EF539944	EF539993	EF540002	EF539943	EF539946	EF539941	EF539945	EF539942
46	EF539937	EF539936
47	EF539951	EF539952	EF540001
48	EF539950	EF539949
49	EF540186	EF539969
50	EF539953	EF539954
51	EF539928	EF539929	EF539933	EF539927	EF539977	EF539931
52	EF539957	EF540003
53	EF539980	EF539982
54	EF539978	EF539997	EF539995	EF539971	EF539958	EF540039	EF539998	EF539979	EF539986	EF539976	EF539970	EF539972
55	EF540242	EF540241	EF540243	EF540198
56	EF540244	EF540248	EF540250	EF540251	EF540246	EF540245	EF540252	EF540249	EF540247
57	EF540275	EF540271	EF540274	EF540272
58	EF540269	EF540270	EF540228
59	EF540268	EF540267	EF540197
60	EF540195	EF540261	EF540263	EF540260	EF540276
61	EF540259	EF540196	EF540277
62	EF540266	EF540265
63	EF540136
64	EF540132
65	EF540131
66	EF540133
67	EF540135
68	EF540139
69	EF540254
70	EF540067
71	EF540094
72	EF540087
73	EF540052
74	EF540080
75	EF540086
76	EF540102
77	EF540050
78	EF540060
79	EF540059
80	EF540032
81	EF540007
82	EF540033
83	EF540031
84	EF540025
85	EF540191
86	EF540105
87	EF540099
88	EF540026
89	EF540021
90	EF540090
91	EF540022
92	EF540023
93	EF540028
94	EF540078
95	EF540029
96	EF540101
97	EF540027
98	EF540068
99	EF539961
100	EF540236
101	EF540088
102	EF540073
103	EF540043
104	EF540044
105	EF540108
106	EF540109
107	EF540074
108	EF540193
109	EF540204
110	EF540205
111	EF540203
112	EF540304
113	EF540218
114	EF540221
115	EF540222
116	EF540233
117	EF540231
118	EF540230
119	EF540209
120	EF540225
121	EF540224
122	EF540303
123	EF540292
124	EF540295
125	EF540300
126	EF540319
127	EF540293
128	EF540294
129	EF540310
130	EF540297
131	EF540298
132	EF540301
133	EF540302
134	EF539913
135	EF539914
136	EF540160
137	EF539904
138	EF540167
139	EF540156
140	EF540157
141	EF540176
142	EF540235
143	EF540190
144	EF540159
145	EF540164
146	EF540179
147	EF540257
148	EF539919
149	EF540150
150	EF540151
151	EF540004
152	EF540255
153	EF540258
154	EF540180
155	EF540279
156	EF540281
157	EF540284
158	EF540287
159	EF540314
160	EF540315
161	EF540316
162	EF539968
163	EF539962
164	EF539987
165	EF539947
166	EF539948
167	EF539935
168	EF539996
169	EF539938
170	EF539940
171	EF539939
172	EF539955
173	EF539956
174	EF539930
175	EF539932
176	EF539934
177	EF539983
178	EF540129
179	EF539981
180	EF539959
181	EF539960
182	EF539984
183	EF540000
184	EF539994
185	EF539999
186	EF539973
187	EF539975
188	EF540273
189	EF540262
190	EF540256
191	EF540264
192	EF540173
193	EF540253
194	EF540122
195	EF540144
196	EF540237
[truncated: 3 more columns]
